S1Fig: Trial profile

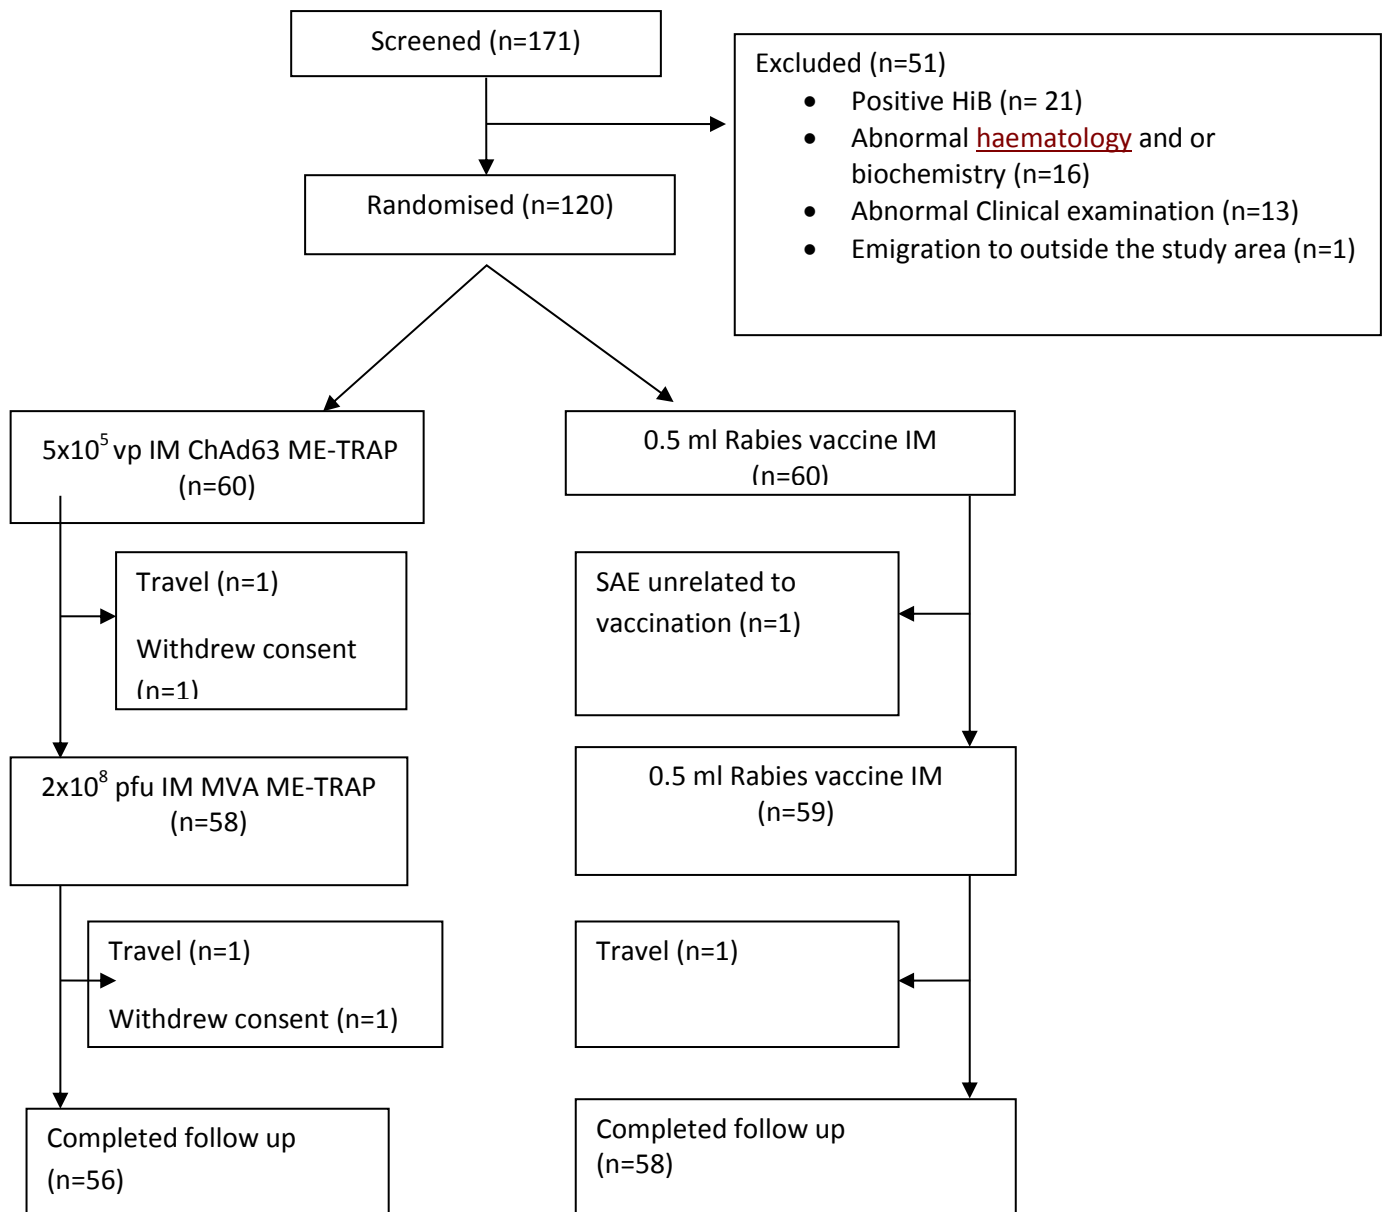

Source: https://storage.googleapis.com/plos-corpus-prod/10.1371/journal.pone.0167951/1/pone.0167951.s004.pdf
